# Supplementary material
Source: bioRxiv or medRxiv preprint supplement (https://www.biorxiv.org/highwire/filestream/11670/field_highwire_adjunct_files/2/040386-3.pdf)

# A. *aegypti* Ensemble Model under Current Climate Conditions

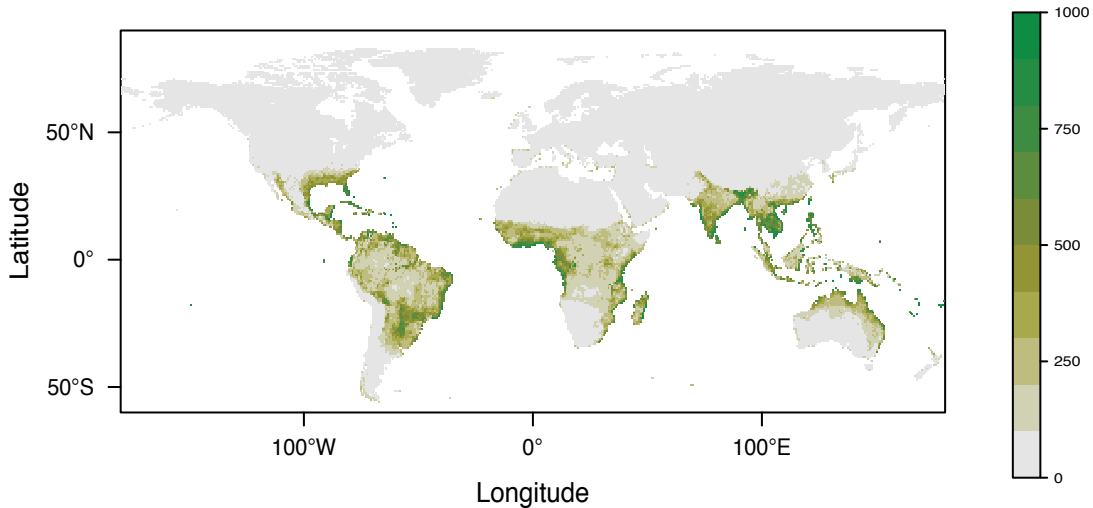

Supplement: Supplementary file [file 040386-3.pdf]
